# Supplementary material
Source: publisher figshare collection journal article supplement (https://karger.figshare.com/ndownloader/files/14150939)
Supplement: Supplementary file 1 [file 14150939]

## **SUPPLEMENTARY INFORMATION FOR:**

### **Cell Type-specific Gene Expression of $\alpha 5$ -subunit-containing GABA-A Receptors in Human and Mouse Frontal Cortex**

Xiyue Hu, Brad R. Rocco, Corey Fee, Etienne Sibille\*

\*To whom correspondence should be addressed. Email: Etienne.Sibille@camh.ca

#### **Table of Contents**

##### **Supplementary Tables**

- **Supplementary Table 1.** Demographic and postmortem characteristics of human brain samples.

##### **Supplementary Figures**

- **Supplementary Figure 1.** Frequency distribution of  $\alpha 5$  mRNA grains per cell body, all cell types

**Supplementary Table 1. Demographic and postmortem characteristics of human brain samples.**

| <b>Subject</b> | <b>Sex</b> | <b>Race</b> | <b>Age (yrs)</b> | <b>PMI<sup>A</sup></b> | <b>pH</b> | <b>Cause of Death</b>                    |
|----------------|------------|-------------|------------------|------------------------|-----------|------------------------------------------|
| <b>1</b>       | Male       | Caucasian   | 47               | 12                     | 6.49      | Natural (Myocardial ischemia)            |
| <b>2</b>       | Male       | Caucasian   | 46               | 19.5                   | 6.42      | Natural (Myocardial infarction)          |
| <b>3</b>       | Male       | Caucasian   | 51               | 15                     | 6.83      | Accident                                 |
| <b>4</b>       | Male       | Caucasian   | 55               | 24                     | 6.75      | Accident                                 |
| <b>5</b>       | Male       | Caucasian   | 55               | 21                     | 6.70      | Natural (Acute myocardial insufficiency) |

PMI<sup>A</sup>, post-mortem interval (hours)

## Supplementary Figure 1

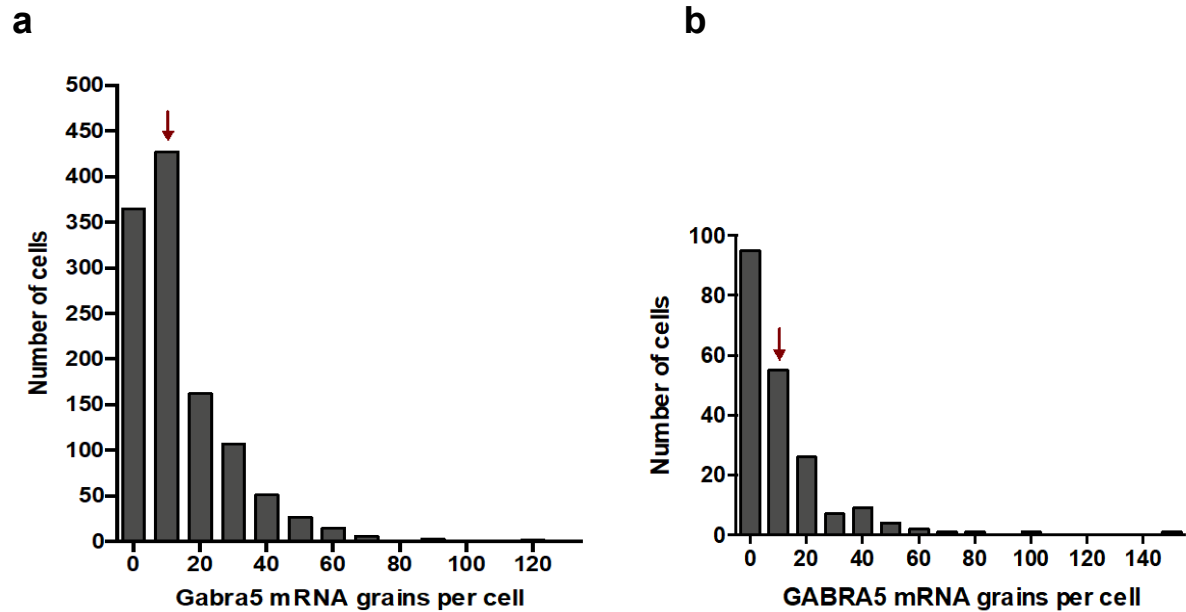

**Figure 1. Frequency distribution of  $\alpha 5$  mRNA grains per cell body, all cell types**  
Histograms (bin width=10) of **(a)** *Gabra5* (mouse) and **(b)** GABRA5 (human) mRNA grains per each cell sampled. Arrows indicate the bin with cells containing 10-19 mRNA grains. Cells containing  $\geq 10$  mRNA grains were defined as *Gabra5*/GABRA5 positive cells.
